# Supplementary material
Source: PubMed Central journal article supplement (PMC2702093)
Supplement: NIHMS95275-supplement-1.pdf [file NIHMS95275-supplement-1.pdf]

### **Supplemental figure 1. Characterization of the LPS-induced Loss of Mouse Nigral Neurons.**

To investigate the selectivity of the neurodegeneration, double-label immunofluorescence was performed by incubating brain sections with antibodies against a neuron-specific nuclear protein (Neu-N, 1:2000, Chemicon, Temecula, CA) and tyrosine hydroxylase (TH), followed by incubation with Alexa-488 (green) and Alexa-594 (red) conjugated secondary antibodies (1:1000). Neurons in general were labeled with anti-Neu-N antibody (red). Dopamine neurons were labeled with both anti-TH antibody in cytoplasm (green) and anti-Neu-N antibody in nuclei. In the pars compact region of the LPS-injected substantial nigra, the number of dopamine neurons was significantly fewer than that in the NS-injected side in nTg, M7KO and M83KO mice. The number of non-dopaminergic neurons (nuclear Neu-N immunoreactivity only) was not significantly decreased. In SYNKO mice, the number and the intactness of the intricate network of the dopaminergic fibers in the LPS-injected side did not show significant change, compared with the NS-injected side. NS: normal saline.

### **Supplemental figure 2. LPS-induced Activation of Astroglia in the Mouse Substantial Nigra**

One week after stereotaxic injection of LPS and saline (NS), the brain sections were immunostained with an antibody against glial fibrillary acidic protein (GFAP, 1:1000, Dako, Carpinteria, CA) to determine the activation of astroglia. In the NS-injected substantial nigra, astroglia exhibited the resting morphology. In the LPS-injected substantial nigra, astroglia exhibited activated morphology with increased expression of GFAP. Note the activation status of astroglia did not show significant difference among different genotypes.
